# Supplementary material
Source: PubMed Central journal article supplement (PMC156351)

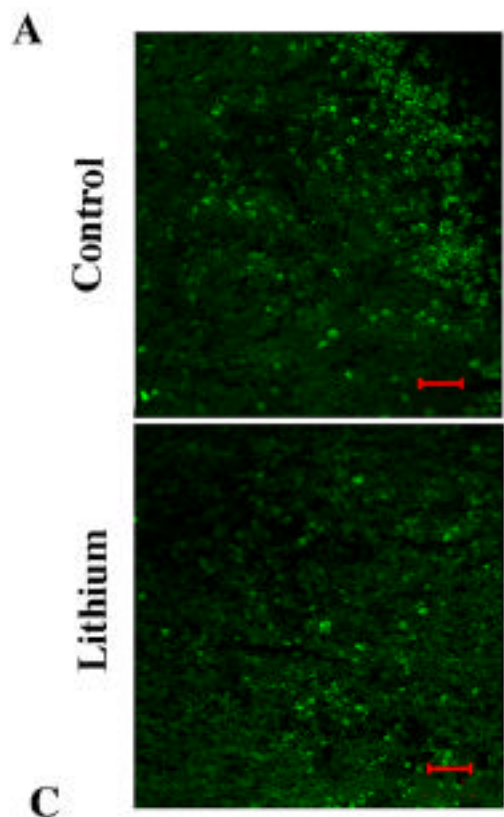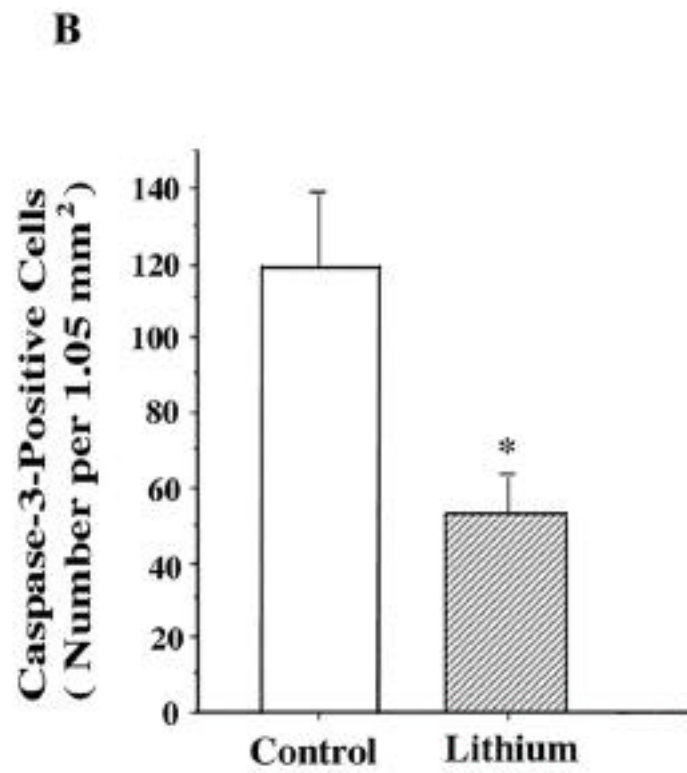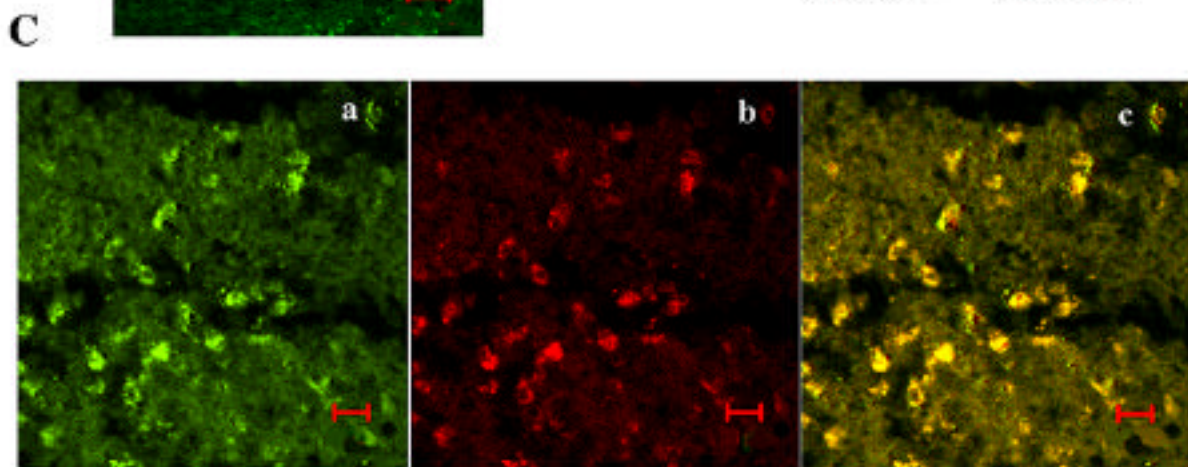

Supplement: pnas_0937423100_2.pdf [file pnas_0937423100_2.pdf]
